# Supplementary material
Source: bioRxiv or medRxiv preprint supplement (https://www.biorxiv.org/highwire/filestream/75909/field_highwire_adjunct_files/0/241760-1.pdf)

# Karasov, Figure S1

**a**

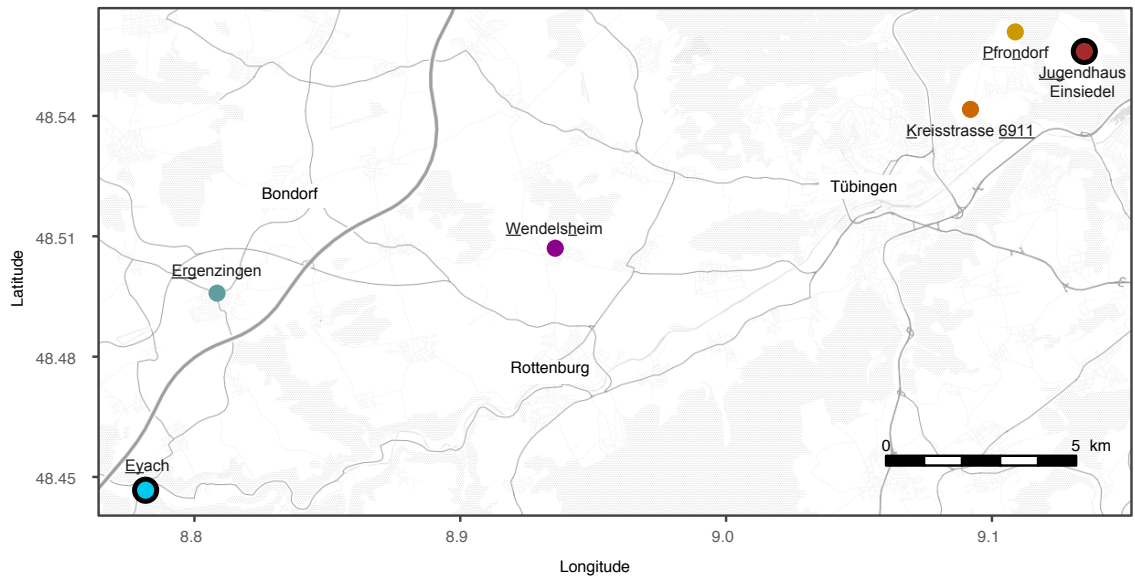

**b**

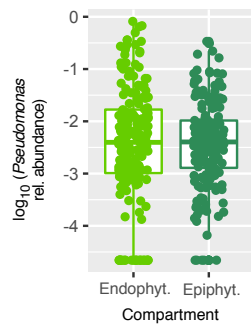

**c**

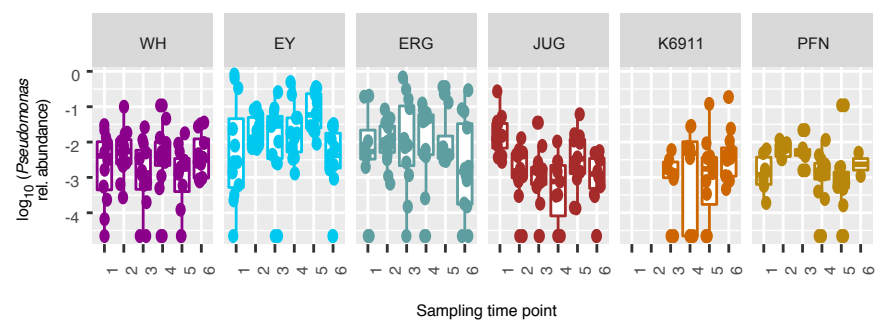

**d**

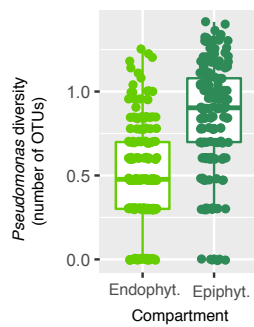

**e**

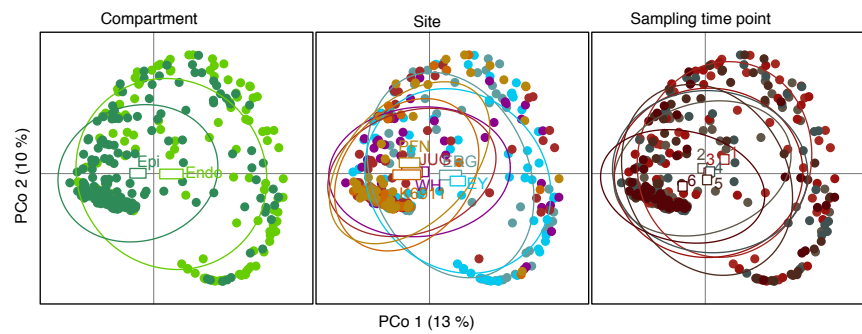

Supplement: Supplementary file [file 241760-1.pdf]
